# Supplementary material for: Comprehensive analysis of the major histocompatibility complex in systemic sclerosis identifies differential HLA associations by clinical and serological subtypes
Source: PubMed Central journal article supplement — Ann Rheum Dis. 2021 Apr 1;80(8):1040–7. doi: 10.1136/annrheumdis-2021-219884 (PMC8292594; doi:10.1136/annrheumdis-2021-219884), 2021-04-01
Supplement: annrheumdis-2021-219884supp001.pdf [file annrheumdis-2021-219884supp001.pdf]

**Supplementary Table 1.** Summary of the datasets included in the study

|                                  | GWAS Study           | Genotyping platform (case / control)                                                                               | N (case / control) - After genotyping QC steps | N <sub>FINAL</sub> (case / control) | No. variants after imputation and QC | Reference for case/control data (PMID) |
|----------------------------------|----------------------|--------------------------------------------------------------------------------------------------------------------|------------------------------------------------|-------------------------------------|--------------------------------------|----------------------------------------|
| <b>Previous SSc GWAS cohorts</b> | Spain 1              | Illumina HumanCNV370K / Illumina HumanCNV370K                                                                      | 376/388                                        | 361/355                             | 8,274                                | 20383147 / 20383147                    |
|                                  | Germany 1            | Illumina HumanCNV370K / Illumina HumanHap550k                                                                      | 280/667                                        | 257/659                             | 8,039                                | 20383147 / 20383147                    |
|                                  | The Netherlands 1    | Illumina HumanCNV370K / Illumina HumanHap550k                                                                      | 201/638                                        | 183/626                             | 8,019                                | 20383147 / 20383147                    |
|                                  | USA 1                | Illumina HumanHap550K / Breast cancer controls CGEMS; prostate cancer controls CGEMS; Illumina iControlDB database | 1,491/3,485                                    | 1,365/3,219                         | 8,105                                | 20383147 / 20383147                    |
|                                  | France               | Illumina Human610-Quad BeadChip                                                                                    | 564/488                                        | 541/470                             | 8,143                                | 21750679 / 21750679                    |
| <b>New SSc GWAS cohorts</b>      | Spain 2              | Illumina HumanCore; HumanCytoSNP-12v2 / Illumina HumanCore                                                         | 1,293/1,324                                    | 1,169/1,262                         | 8,277                                | 31672989 / 28041642                    |
|                                  | Germany 2            | Illumina HumanCore / Illumina HumanOmniExpressExome 8v1.2.                                                         | 404/1,149                                      | 364/1,133                           | 8,056                                | 31672989 / 28973304                    |
|                                  | The Netherlands 2    | Illumina HumanCore / Illumina HumanHap550k                                                                         | 541/846                                        | 449/812                             | 8,000                                | 31672989 / 20190752                    |
|                                  | USA 2                | Illumina HumanCore / HumanHap300v1.1                                                                               | 1,430/1,580                                    | 1,286/1,388                         | 8,112                                | 31672989 / 18204446                    |
|                                  | Italy                | Illumina HumanCore / Illumina HumanHap550k                                                                         | 1,018/960                                      | 998/952                             | 8,282                                | 31672989 / 26502338; 20190752          |
|                                  | UK                   | Illumina HumanCore / Affymetrix GeneChip 500K Mapping Array                                                        | 1,162/2,978                                    | 1,094/2,936                         | 8,006                                | 31672989 / 17554300                    |
|                                  | Sweden               | Illumina HumanCore / Illumina HumanHap300k                                                                         | 192/1,079                                      | 170/1,029                           | 8,001                                | 31672989 / 20453842                    |
|                                  | Norway               | Illumina HumanCore / Illumina HumanHap550K                                                                         | 102/121                                        | 96/118                              | 7,769                                | 31672989 / 23055271                    |
|                                  | Australia/UK         | Illumina OmniExpress / Affymetrix v6                                                                               | 792/2,630                                      | 762/2,625                           | 8,005                                | 31672989 / WTCCC2                      |
|                                  | <b>META-ANALYSIS</b> |                                                                                                                    |                                                | <b>9,846/18,333</b>                 | <b>9,095/17,584</b>                  | <b>8,338<sup>1</sup></b>               |

CGEMS, Cancer Genetic Markers of Susceptibility studies; QC, quality control; SSc, systemic sclerosis.

<sup>1</sup>Total number of variants included in the meta-analysis.

Supplementary Table 2. Linkage disequilibrium assessment ( $r^2$ ) among the independently associated variants in the global analysis.

|               | HLA_B_0801 | rs2844532 | rs3094228 | rs9268515 | AA_DRB1_1le67 | AA_DRB1_Tyr60 | AA_DRB1_Ala58 | HLA_DRB1_1104 | HLA_DRB1_1301 | rs482044 | HLA_DQA1_0401 | AA_DQA1_Thr69 | rs1142338* | rs1048372* | HLA_DQB1_0202 | HLA_DQB1_0501 | rs17500468 | rs126511* | AA_DPB1_Lcu11 | AA_DPB1_1le76 | HLA_DPB1_0301 | HLA_DPB1_0601 | HLA_DPB1_1301 | rs9469378 |  |
|---------------|------------|-----------|-----------|-----------|---------------|---------------|---------------|---------------|---------------|----------|---------------|---------------|------------|------------|---------------|---------------|------------|-----------|---------------|---------------|---------------|---------------|---------------|-----------|--|
| HLA_B_0801    | 1.000      |           |           |           |               |               |               |               |               |          |               |               |            |            |               |               |            |           |               |               |               |               |               |           |  |
| rs2844532     | 0.033      | 1.000     |           |           |               |               |               |               |               |          |               |               |            |            |               |               |            |           |               |               |               |               |               |           |  |
| rs3094228     | 0.468      | 0.011     | 1.000     |           |               |               |               |               |               |          |               |               |            |            |               |               |            |           |               |               |               |               |               |           |  |
| rs9268515     | 0.010      | 0.004     | 0.007     | 1.000     |               |               |               |               |               |          |               |               |            |            |               |               |            |           |               |               |               |               |               |           |  |
| AA_DRB1_1le67 | 0.045      | 0.007     | 0.050     | 0.073     | 1.000         |               |               |               |               |          |               |               |            |            |               |               |            |           |               |               |               |               |               |           |  |
| AA_DRB1_Tyr60 | 0.017      | 0.020     | 0.023     | 0.029     | 0.125         | 1.000         |               |               |               |          |               |               |            |            |               |               |            |           |               |               |               |               |               |           |  |
| AA_DRB1_Ala58 | 0.016      | 0.000     | 0.011     | 0.001     | 0.060         | 0.023         | 1.000         |               |               |          |               |               |            |            |               |               |            |           |               |               |               |               |               |           |  |
| HLA_DRB1_1104 | 0.008      | 0.003     | 0.050     | 0.010     | 0.027         | 0.008         | 0.382         | 1.000         |               |          |               |               |            |            |               |               |            |           |               |               |               |               |               |           |  |
| HLA_DRB1_1301 | 0.002      | 0.001     | 0.004     | 0.003     | 0.087         | 0.013         | 0.008         | 0.003         | 1.000         |          |               |               |            |            |               |               |            |           |               |               |               |               |               |           |  |
| rs482044      | 0.040      | 0.031     | 0.053     | 0.210     | 0.029         | 0.192         | 0.082         | 0.030         | 0.088         | 1.000    |               |               |            |            |               |               |            |           |               |               |               |               |               |           |  |
| HLA_DQA1_0401 | 0.002      | 0.002     | 0.003     | 0.007     | 0.022         | 0.009         | 0.003         | 0.001         | 0.002         | 0.025    | 1.000         |               |            |            |               |               |            |           |               |               |               |               |               |           |  |
| AA_DQA1_Thr69 | 0.002      | 0.002     | 0.003     | 0.007     | 0.018         | 0.009         | 0.003         | 0.001         | 0.003         | 0.027    | 0.929         | 1.000         |            |            |               |               |            |           |               |               |               |               |               |           |  |
| rs1142338*    | 0.002      | 0.002     | 0.003     | 0.007     | 0.022         | 0.009         | 0.003         | 0.001         | 0.002         | 0.025    | 1.000         | 0.929         | 1.000      |            |               |               |            |           |               |               |               |               |               |           |  |
| rs1048372*    | 0.034      | 0.006     | 0.044     | 0.058     | 0.699         | 0.094         | 0.062         | 0.022         | 0.098         | 0.020    | 0.019         | 0.021         | 0.019      | 1.000      |               |               |            |           |               |               |               |               |               |           |  |
| HLA_DQB1_0202 | 0.009      | 0.063     | 0.015     | 0.016     | 0.143         | 0.455         | 0.011         | 0.003         | 0.005         | 0.149    | 0.004         | 0.005         | 0.004      | 0.168      | 1.000         |               |            |           |               |               |               |               |               |           |  |
| HLA_DQB1_0501 | 0.010      | 0.005     | 0.018     | 0.024     | 0.069         | 0.029         | 0.019         | 0.008         | 0.010         | 0.054    | 0.005         | 0.006         | 0.005      | 0.089      | 0.014         | 1.000         |            |           |               |               |               |               |               |           |  |
| rs17500468    | 0.013      | 0.004     | 0.000     | 0.000     | 0.049         | 0.023         | 0.126         | 0.107         | 0.000         | 0.035    | 0.002         | 0.002         | 0.041      | 0.013      | 0.073         | 1.000         |            |           |               |               |               |               |               |           |  |
| rs1126511*    | 0.004      | 0.003     | 0.003     | 0.000     | 0.001         | 0.011         | 0.003         | 0.002         | 0.000         | 0.013    | 0.002         | 0.002         | 0.003      | 0.017      | 0.000         | 0.001         | 1.000      |           |               |               |               |               |               |           |  |
| AA_DPB1_Lcu11 | 0.004      | 0.003     | 0.003     | 0.000     | 0.001         | 0.011         | 0.003         | 0.002         | 0.000         | 0.013    | 0.002         | 0.002         | 0.003      | 0.017      | 0.000         | 0.001         | 1.000      |           |               |               |               |               |               |           |  |
| AA_DPB1_1le76 | 0.002      | 0.001     | 0.000     | 0.000     | 0.007         | 0.004         | 0.000         | 0.000         | 0.002         | 0.003    | 0.000         | 0.000         | 0.000      | 0.006      | 0.000         | 0.002         | 0.065      | 1.000     |               |               |               |               |               |           |  |
| HLA_DPB1_0301 | 0.000      | 0.000     | 0.000     | 0.000     | 0.001         | 0.002         | 0.002         | 0.001         | 0.000         | 0.000    | 0.009         | 0.009         | 0.000      | 0.001      | 0.000         | 0.001         | 0.405      | 0.405     | 1.000         |               |               |               |               |           |  |
| HLA_DPB1_0601 | 0.001      | 0.000     | 0.000     | 0.028     | 0.006         | 0.002         | 0.002         | 0.001         | 0.001         | 0.010    | 0.000         | 0.000         | 0.000      | 0.006      | 0.001         | 0.000         | 0.002      | 0.063     | 0.063         | 1.000         |               |               |               |           |  |
| HLA_DPB1_1301 | 0.002      | 0.000     | 0.000     | 0.002     | 0.005         | 0.006         | 0.000         | 0.000         | 0.000         | 0.001    | 0.000         | 0.000         | 0.003      | 0.000      | 0.000         | 0.001         | 0.089      | 0.089     | 0.816         | 1.000         |               |               |               |           |  |
| rs9469378     | 0.002      | 0.000     | 0.000     | 0.003     | 0.010         | 0.001         | 0.000         | 0.000         | 0.001         | 0.000    | 0.001         | 0.001         | 0.001      | 0.008      | 0.001         | 0.001         | 0.011      | 0.011     | 0.220         | 0.004         | 0.000         | 0.274         | 1.000         |           |  |

In boldface the variants without other variants in LD; AA: amino acids

\*Coding single nucleotide polymorphisms

The image shows a large, dense table with multiple columns and rows. The text within the table is extremely small and difficult to read, but it appears to be a list of references or a detailed data table. The table is oriented horizontally on the page, which is a common format for supplemental material in scientific journals. The content likely includes author names, titles of articles, and possibly journal names or publication years, given the context of the journal 'Ann Rheum Dis'.

**Supplementary Table 4.** Number of patients with clinical and serological information included in the study.

| <b>GWAS Study</b>    | <b>lcSSc (%)</b> | <b>dcSSc (%)</b> | <b>ACA+ (%)</b> | <b>ATA+ (%)</b> | <b>ARA+ (%)</b> | <b>Total Cases</b> |
|----------------------|------------------|------------------|-----------------|-----------------|-----------------|--------------------|
| <b>Spain 1</b>       | 220 (60.94)      | 90 (24.93)       | 170 (47.09)     | 80 (22.16)      | NA              | 361                |
| <b>Germany 1</b>     | 148 (57.58)      | 100 (38.91)      | 116 (45.13)     | 76 (29.57)      | NA              | 257                |
| <b>Netherlands 1</b> | 125 (68.30)      | 40 (21.85)       | 42 (22.95)      | 42 (22.95)      | NA              | 183                |
| <b>USA 1</b>         | 822 (60.21)      | 466 (34.13)      | 395 (28.93)     | 210 (15.38)     | NA              | 1365               |
| <b>France</b>        | 341 (63.03)      | 177 (32.71)      | 191 (35.30)     | 123 (22.73)     | NA              | 541                |
| <b>Spain 2</b>       | 684 (58.51)      | 282 (24.12)      | 470 (40.20)     | 221 (18.90)     | 25 (2.13)       | 1169               |
| <b>Germany 2</b>     | 180 (49.45)      | 120 (32.96)      | 133 (36.53)     | 95 (26.09)      | NA              | 364                |
| <b>Netherlands 2</b> | 296 (65.92)      | 95 (21.15)       | 143 (31.84)     | 74 (16.48)      | NA              | 449                |
| <b>USA 2</b>         | 750 (58.32)      | 471 (36.62)      | 411 (31.95)     | 193 (15.00)     | 218 (16.95)     | 1286               |
| <b>Italy</b>         | 588 (58.91)      | 193 (19.33)      | 436 (43.68)     | 328 (32.86)     | 197 (19.73)     | 998                |
| <b>UK</b>            | 774 (70.74)      | 236 (21.57)      | 396 (36.19)     | 173 (15.81)     | 118 (10.78)     | 1094               |
| <b>Sweden</b>        | 120 (70.58)      | 50 (29.41)       | 44 (25.88)      | 25 (14.70)      | NA              | 170                |
| <b>Norway</b>        | 59 (61.45)       | 31 (32.29)       | 49 (51.04)      | 15 (15.62)      | NA              | 96                 |
| <b>Australia/UK</b>  | 579 (75.98)      | 173 (22.70)      | 348 (45.66)     | 94 (12.33)      | NA              | 762                |
| <b>Total</b>         | 5,686 (62.52)    | 2,524 (27.75)    | 3,344 (36.77)   | 1,749 (19.20)   | 558 (6.14)      | 9,095              |

**Supplementary Table 5.** Sequential conditional analysis results with limited cutaneous systemic sclerosis.

| <b>Gene</b>     | <b>Alleles</b>    | <b>Meta p-value<sup>a</sup></b> | <b>OR</b> | <b>Conditioned p-value</b> |
|-----------------|-------------------|---------------------------------|-----------|----------------------------|
| <i>HLA-DQA1</i> | <b>DQA1*02:01</b> | 5.23E-51                        | 0.54      | --                         |
| <i>HLA-DRB1</i> | DRB1*08:01        | 2.74E-33                        | 2.18      | 8.07E-29                   |
| <i>HLA-DRB1</i> | DRB1*11:04        | 2.69E-26                        | 1.81      | 5.02E-24                   |
| <i>HLA-DQB1</i> | DQB1*05:01        | 1.07E-21                        | 1.38      | 7.34E-21                   |
| <i>HLA-DPB1</i> | DPB1*13:01        | 5.46E-14                        | 1.73      | 2.18E-17                   |
| <i>HLA-DRB1</i> | DRB1*13:01        | 1.94E-11                        | 0.69      | 1.85E-09                   |

In boldface the alleles exclusively associated with this clinical phenotype, OR: Odds ratio

<sup>a</sup>Comparisons were performed with the control group

**Supplementary Table 6.** Sequential conditional analysis results with diffuse cutaneous systemic sclerosis.

| Gene            | Alleles           | Meta p-value <sup>a</sup> | OR   | Conditioned p-value |
|-----------------|-------------------|---------------------------|------|---------------------|
| <i>HLA-DRB1</i> | DRB1*11:04        | 3.32E-75                  | 3.18 | --                  |
| <i>HLA-DPB1</i> | DPB1*13:01        | 2.94E-44                  | 3.12 | 3.82E-41            |
| <i>HLA-DQA1</i> | <b>DQA1*05:01</b> | 1.16E-30                  | 1.49 | 1.59E-11            |

In Boldface the alleles exclusively associated with this clinical phenotype, OR: Odds ratio

<sup>a</sup>Comparisons were performed with the control group

**Supplementary Table 7.** Sequential conditional analysis results with anticomere positive patients

| Gene            | Alleles           | Meta p-value <sup>a</sup> | OR   | Conditioned p-value |
|-----------------|-------------------|---------------------------|------|---------------------|
| <i>HLA-DQB1</i> | DQB1*05:01        | 1.16E-66                  | 1.97 | --                  |
| <i>HLA-DRB1</i> | <b>DRB1*08:01</b> | 9.73E-57                  | 3.18 | 4.00E-64            |
| <i>HLA-DRB1</i> | <b>DRB1*07:01</b> | 1.17E-63                  | 0.36 | 1.84E-45            |
| <i>HLA-DQA1</i> | DQA1*03:01        | 2.01E-13                  | 1.31 | 1.97E-20            |

In Boldface the alleles exclusively associated with this serological phenotype, OR: Odds ratio

<sup>a</sup>Comparisons were performed with the control group

**Supplementary Table 8.** Sequential conditional analysis results with antitopoisomerase positive patients

| <b>Gene</b>     | <b>Alleles</b>   | <b>Meta p-value<sup>a</sup></b> | <b>OR</b> | <b>Conditioned p-value</b> |
|-----------------|------------------|---------------------------------|-----------|----------------------------|
| <i>HLA-DPB1</i> | DPB1*1301        | 2.24E-138                       | 6.81      | --                         |
| <i>HLA-DRB1</i> | DRB1*1104        | 3.25E-135                       | 4.92      | 4.57E-127                  |
| <i>HLA-DRB1</i> | DRB1*1501        | 1.76E-15                        | 1.53      | 3.37E-22                   |
| <i>HLA-DPA1</i> | <b>DPA1*0201</b> | 7.91E-43                        | 1.87      | 2.93E-19                   |
| <i>HLA-DQB1</i> | <b>DQB1*0301</b> | 7.11E-47                        | 1.86      | 7.00E-19                   |
| <i>HLA-DQB1</i> | DQB1*0303        | 5.67E-11                        | 1.69      | 4.85E-09                   |

In Boldface the alleles exclusively associated with this serological phenotype, OR: Odds ratio

<sup>a</sup>Comparisons were performed with the control group



**Supplementary Table 9.** Sequential conditional analysis results with anti-RNAPolIII positive patients

| <b>Gene</b> | <b>Alleles</b> | <b>Meta p-value<sup>a</sup></b> | <b>OR</b> | <b>Conditioned p-value</b> |
|-------------|----------------|---------------------------------|-----------|----------------------------|
| HLA-DRB1    | DRB1*11:04     | 1.72E-16                        | 2.64      | --                         |

OR: Odds ratio

<sup>a</sup>Comparisons were performed with the control group

**Supplementary Table 10.** Association *p*- values of classical alleles among the different comparisons.

| A. Clinical Subtypes    |                 |                    |                    |                              |
|-------------------------|-----------------|--------------------|--------------------|------------------------------|
| Alleles                 | Global analysis | lcSSc vs. Controls | dcSSc vs. Controls | dcSSc vs. lcSSc <sup>a</sup> |
| DQA1*02:01              | 1.69E-47        | <b>5.23E-51</b>    | 1.15E-07           | 2.08E-08                     |
| DQA1*05:01              | 5.50E-22        | 2.06E-07           | <b>1.16E-30</b>    | 1.76E-11                     |
| B. Serological Subtypes |                 |                    |                    |                              |
| Alleles                 | Global analysis | ACA vs. Controls   | ATA vs. Controls   | ATA vs. ACA <sup>a</sup>     |
| DRB1*08:01              | 3.06E-28        | <b>9.73E-57</b>    | 0.0013             | 1.42E-10                     |
| DRB1*07:01              | 1.83E-47        | <b>1.17E-63</b>    | 0.027              | 3.85E-27                     |
| DPA1*02:01              | 3.77E-07        | 1.38E-05           | <b>2.93E-19</b>    | 1.09E-40                     |
| DQB1*03:01              | 1.72E-14        | 1.99E-04           | <b>7.11E-47</b>    | 1.73E-22                     |

In Boldface the significant *p*- values exclusively associated with this serological phenotype

<sup>a</sup>Significant intra-cases comparisons confirm the private association of the classical alleles
