# Supplementary figures and images for: Comprehensive analysis of the major histocompatibility complex in systemic sclerosis identifies differential HLA associations by clinical and serological subtypes
Source: PubMed Central journal article supplement — Ann Rheum Dis. 2021 Apr 1;80(8):1040–7. doi: 10.1136/annrheumdis-2021-219884 (PMC8292594; doi:10.1136/annrheumdis-2021-219884), 2021-04-01

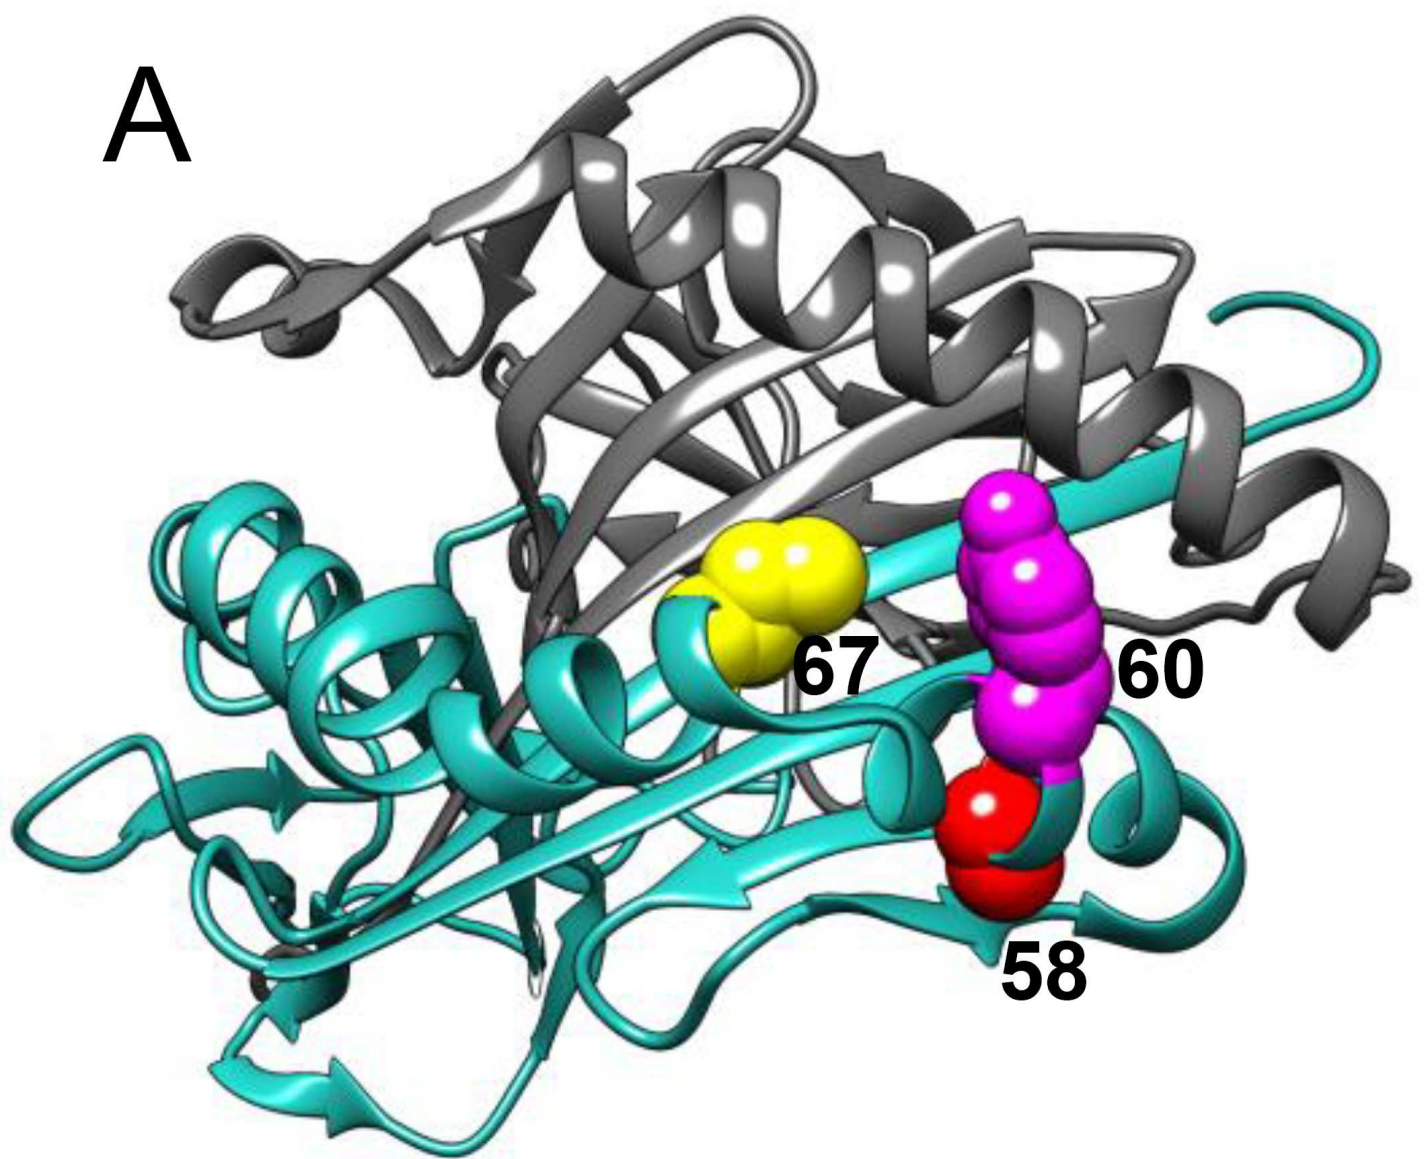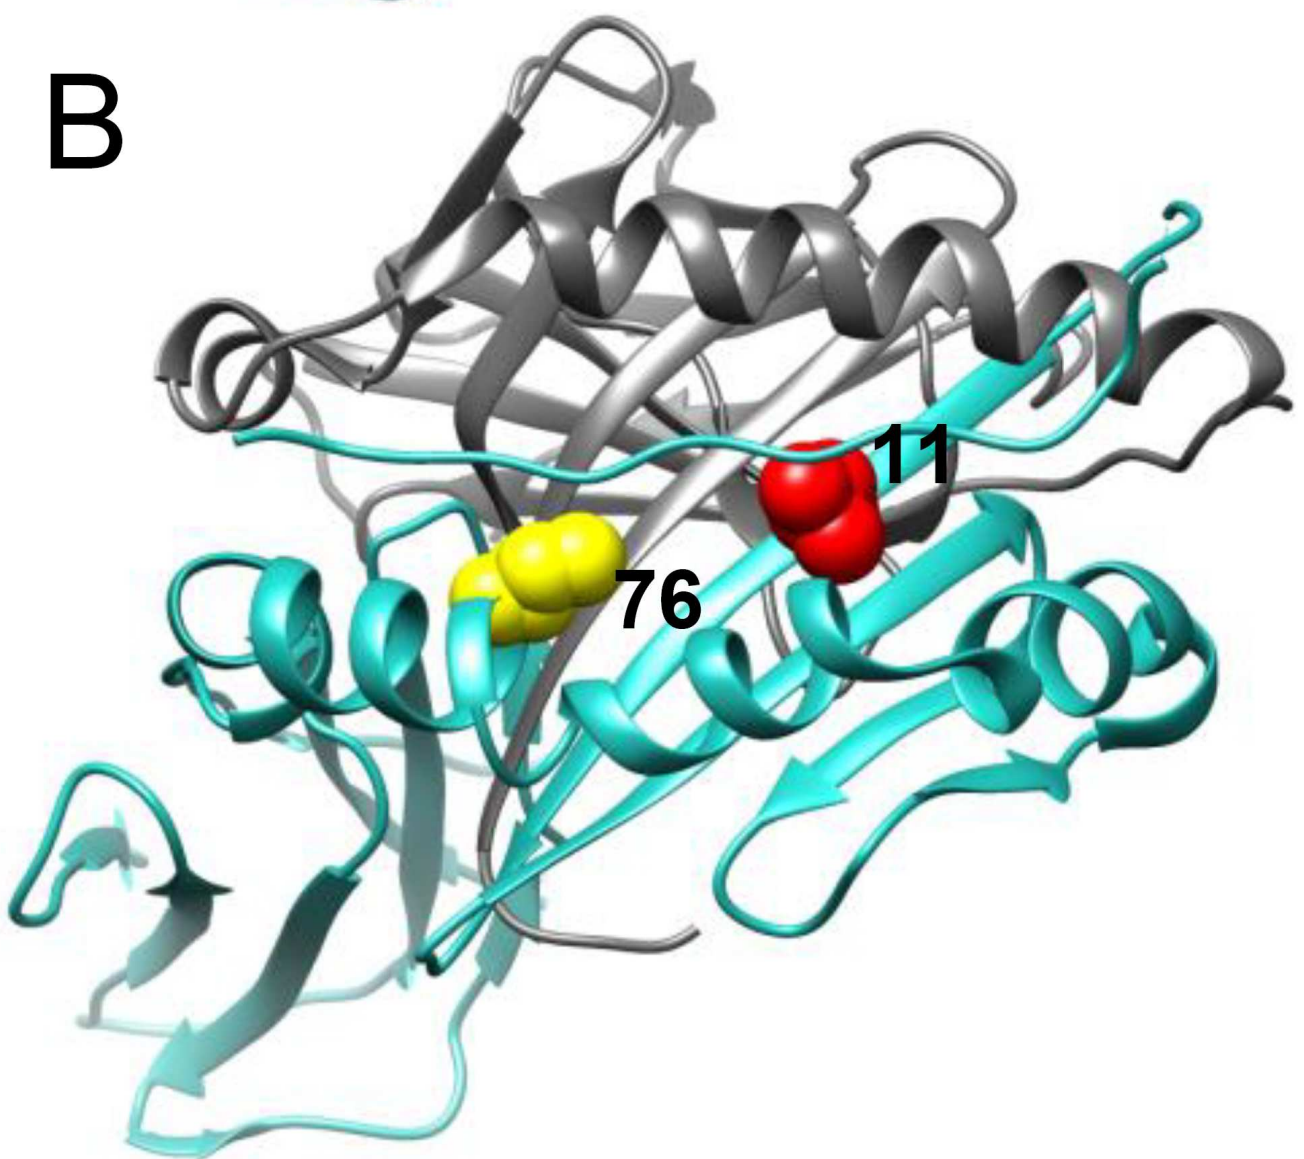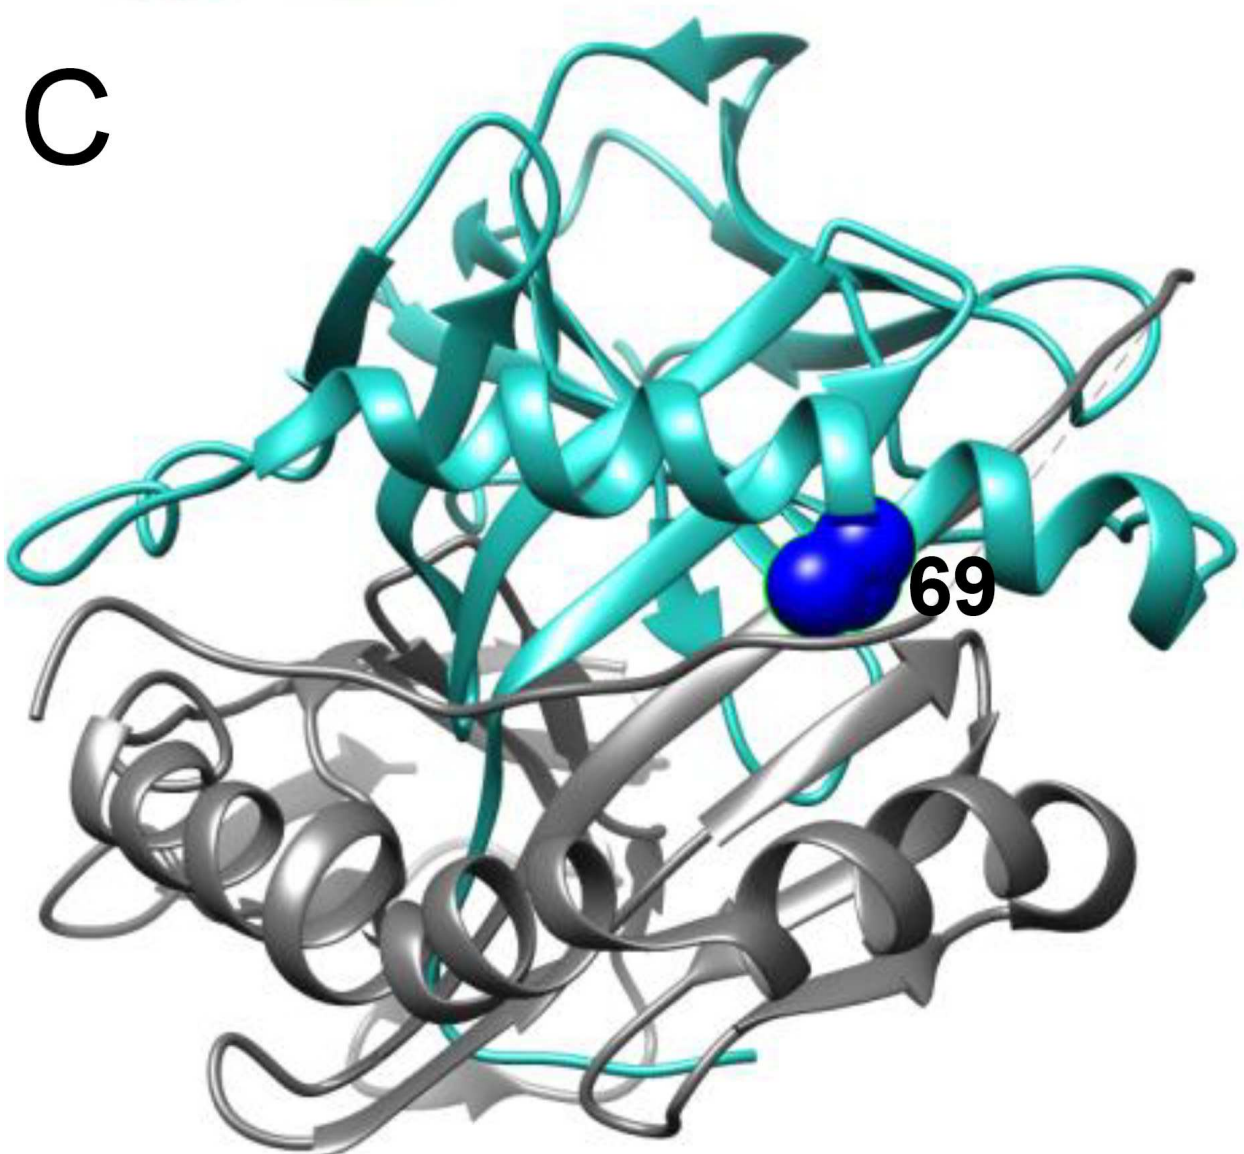

Supplement: annrheumdis-2021-219884supp003.pdf [file annrheumdis-2021-219884supp003.pdf]
